# Supplementary material for: Gene expression profiles of Japanese precious coral Corallium japonicum during gametogenesis
Source: PeerJ journal article supplement (doi:10.7717/peerj.17182), 2024-04-16

**Subcluster I (283 transcripts)**

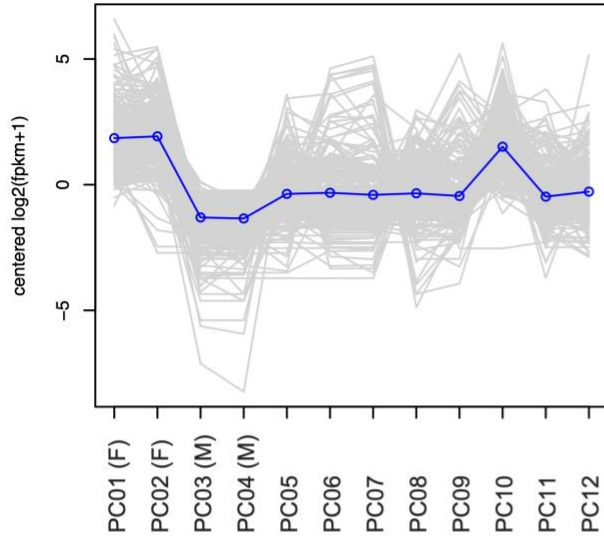

**Subcluster II (525 transcripts)**

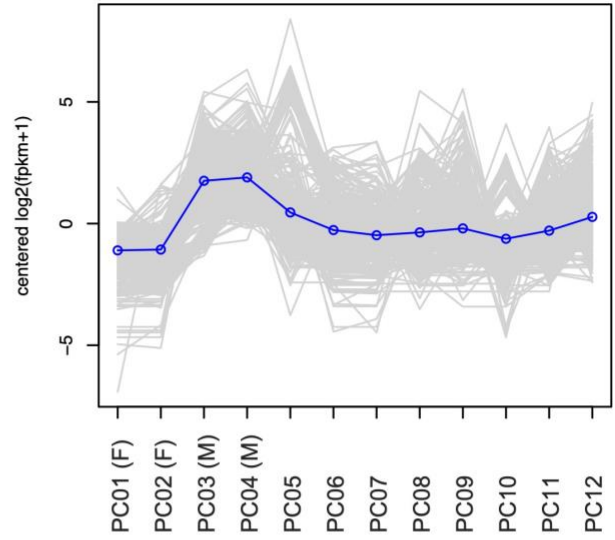

**Subcluster III (46 transcripts)**

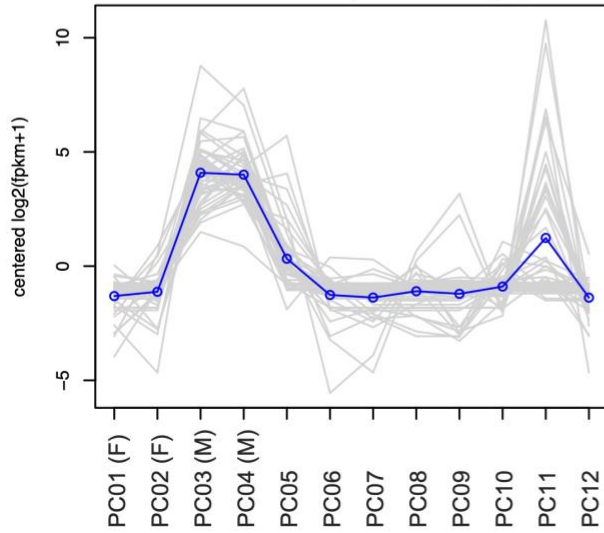

**Subcluster IV (1 transcript)**

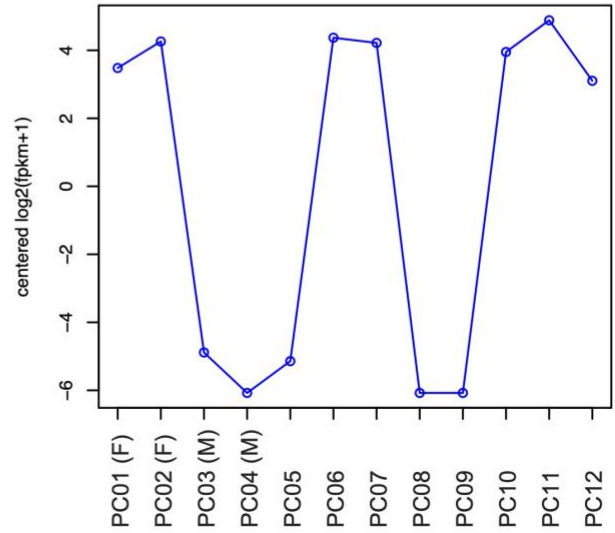

Supplement: FigS1.pdf [file FigS1.pdf]
