# Supplementary material for: Gene expression profiles of Japanese precious coral Corallium japonicum during gametogenesis
Source: PeerJ journal article supplement (doi:10.7717/peerj.17182), 2024-04-16

A

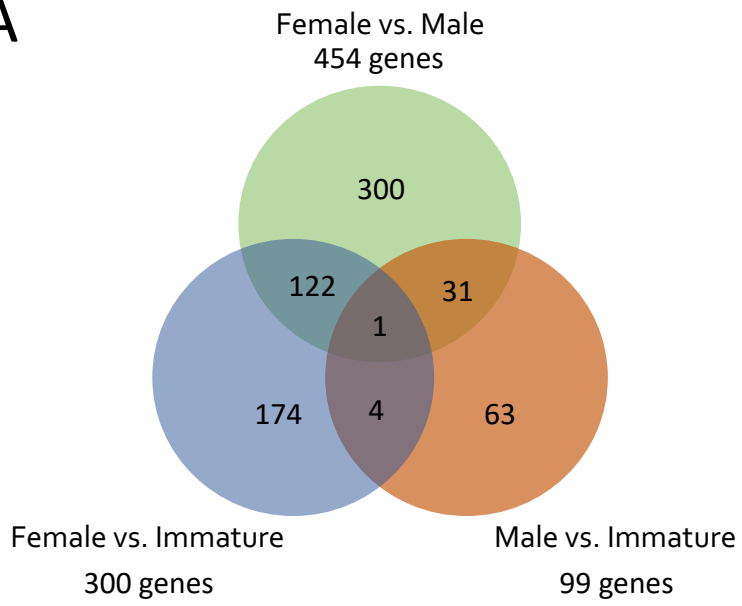

B

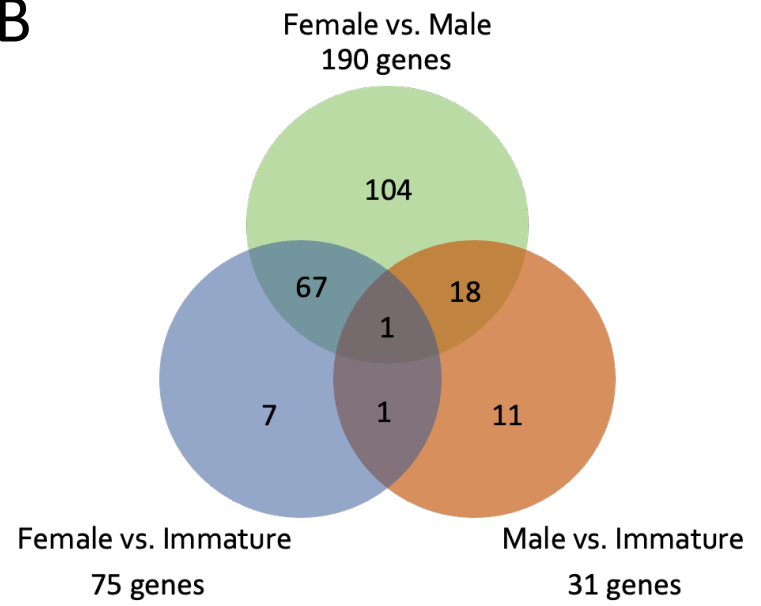

Supplement: FigS2.pdf [file FigS2.pdf]
