# Supplementary material for: Gene expression profiles of Japanese precious coral Corallium japonicum during gametogenesis
Source: PeerJ journal article supplement (doi:10.7717/peerj.17182), 2024-04-16

### Color Key

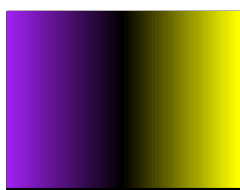

-5 0 5  
Value

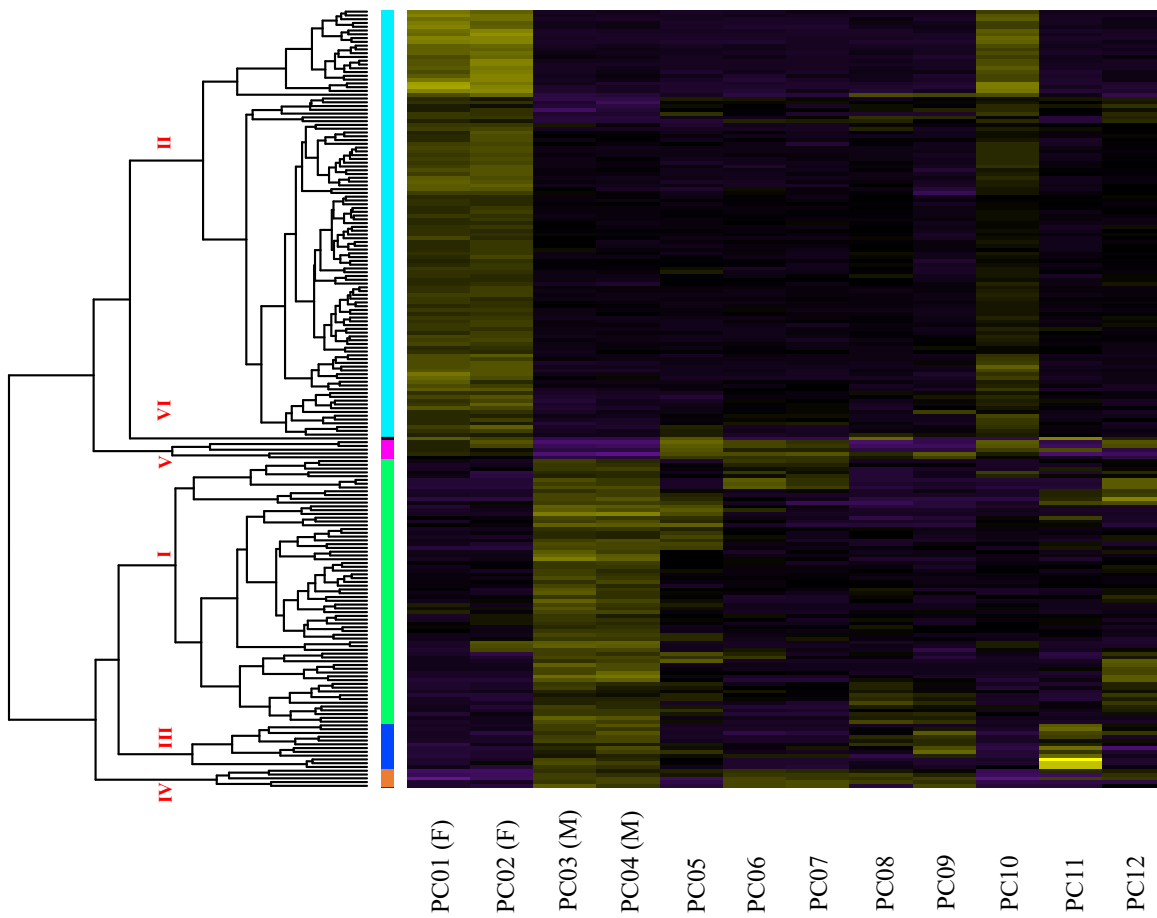

Supplement: FigS3.pdf [file FigS3.pdf]
