# Supplementary material for: Gene expression profiles of Japanese precious coral Corallium japonicum during gametogenesis
Source: PeerJ. 2024 Apr 16;12:e17182. doi: 10.7717/peerj.17182 (PMC11027906; doi:10.7717/peerj.17182)
Supplement: Supplemental Information 12 [file peerj-12-17182-s012.docx]

**Supplemental Table 6.** List of genes that enriched cell adhesion and their corresponding biological function. Genes that are not included do not have matched annotation.

| **Contig ID** | **qseqid|sseqid** | **Annotation** | **E value** |
| --- | --- | --- | --- |
| Contig_28006 | gi|1005473645|ref|XR_001566203.1| | focal adhesion kinase 1-like | 5.92E-15 |
| gi|1176119311|ref|XM_020775242.1| | GTP-binding protein ypt1-like | 5.19E-22 |
| gi|1176064474|ref|XM_020746755.1| | phosphatidylinositol-glycan-specific phospholipase D-like | 3.07E-12 |
| gi|1176096592|ref|XM_020763251.1| | vascular endothelial growth factor A-like | 5.19E-22 |
| Contig_28440 | gi|1176076889|ref|XM_020752810.1| | sushi domain-containing protein 2-like | 1.72E-21 |
| gi|1249003295|ref|XM_022675471.1| | sushi, nidogen and EGF-like domain-containing protein 1 | 1.72E-21 |
